# Supplementary material for: Involvement and Targeted Intervention of Mortalin-Regulated Proteome Phosphorylated-Modification in Hepatocellular Carcinoma
Source: Front Oncol. 2021 Jul 29;11:687871. doi: 10.3389/fonc.2021.687871 (PMC8358780; doi:10.3389/fonc.2021.687871)
Supplement: Supplementary file 3 [file Table_2.xlsx]

## Sheet: Ark1
Normalization	Vector		Average	Std	Mortalin-plasmids		Average	Std	P-value
POS1	114987	117558	116273	1285.56	116808	119120	117964	1155.78	0.431139
POS2	32675.7	31901.3	32288.5	387.233	32127.3	31431	31779.1	348.141	0.431139
NEG	Undetected				Undetected				N/A
ANG-1	0	9.60871	4.80436	4.80436	Undetected				N/A
Angiostatin	Undetected				Undetected				N/A
CXCL16	Undetected				4.83439	0	2.41719	2.41719	N/A
EGF	297.698	206.461	252.08	45.6186	258.908	119.217	189.063	69.8455	0.52886
FGF-4	Undetected				Undetected				N/A
Follistatin	0	91.0299	45.515	45.515	0	21.2888	10.6444	10.6444	0.53343
G-CSF	704.535	790.696	747.616	43.0804	758.193	747.307	752.75	5.44329	0.916684
GM-CSF	470.238	480.582	475.41	5.17182	838.632	804.306	821.469	17.1632	0.00267236
I-309	Undetected				Undetected				N/A
IL-1b	Undetected				Undetected				N/A
IL-4	1702.6	1792.15	1747.37	44.7781	1520.33	1368.53	1444.43	75.8983	0.0751949
IL-10	692.648	752.008	722.328	29.6803	827.755	869.683	848.719	20.9642	0.0736428
IL-12p40	Undetected				Undetected				N/A
IL-12p70	245.215	296.606	270.911	25.6953	286.84	208.081	247.461	39.3796	0.667434
I-TAC	118.75	112.523	115.637	3.11367	114.682	126.909	120.796	6.11323	0.530519
MCP-2	Undetected				Undetected				N/A
MCP-3	Undetected				0	96.4178	48.2089	48.2089	N/A
MCP-4	206.643	136.418	171.531	35.1125	202.239	345.978	274.108	71.8696	0.328259
MMP-1	0	8.85013	4.42507	4.42507	Undetected				N/A
MMP-9	Undetected				Undetected				N/A
PECAM-1	Undetected				Undetected				N/A
TGFa	32.8808	0	16.4404	16.4404	Undetected				N/A
TGFb3	Undetected				Undetected				N/A
Tie-1	Undetected				Undetected				N/A
Tie-2	Undetected				Undetected				N/A
uPAR	Undetected				Undetected				N/A
VEGF	432.004	453.632	442.818	10.8144	807.862	990.274	899.068	91.206	0.0382154
VEGF R2	Undetected				Undetected				N/A
VEGF R3	0	114.04	57.0201	57.0201	195.658	14.0094	104.834	90.8245	0.69932
VEGF-D	0	100.639	50.3193	50.3193	Undetected				N/A
POS-Ave	111733	111733	111733	0	111733	111733	111733	0	N/A
